# Supplementary material for: Promoted lithium polysulfide conversion and immobilization by conductive titanium oxynitride-carbon architecture design for advanced lithium–sulfur batteries
Source: Royal Society of Chemistry journal article supplement (doi:10.1039/d1nr04876g), 2021-01-01
Supplement: d1nr04876g1.pdf [file d1nr04876g1.pdf]

## Supporting Information

### Promoted Lithium Polysulfides Conversion and Immobilization by Conductive Titanium oxynitride-Carbon Architecture Design toward Advanced Lithium-sulfur Batteries

Jing Guo<sup>a</sup>, Hongyu Wang<sup>a</sup>, Yuhong Luo<sup>a</sup>, Hualiang An<sup>a</sup>, Zisheng Zhang<sup>b</sup>,

Guihua Liu<sup>a\*</sup>, Jingde Li<sup>a\*</sup>

<sup>a</sup> Hebei Provincial Key Laboratory of Green Chemical Technology and High Efficient Energy Saving, School of Chemical Engineering and Technology, Hebei University of Technology, Tianjin, 300130, China

<sup>b</sup> Department of Chemical and Biological Engineering, University of Ottawa, Ottawa, ON K1N 6N5, Canada

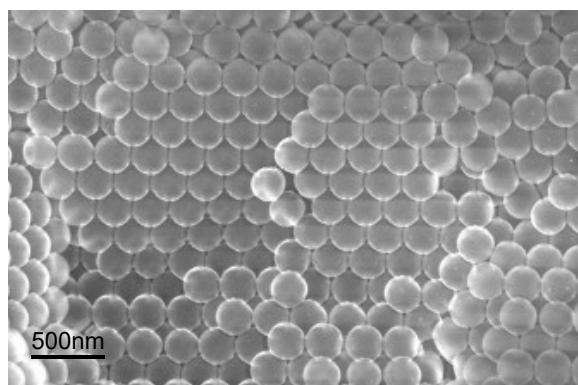

**Fig. S1** SEM image of as-synthesized PS sphere.

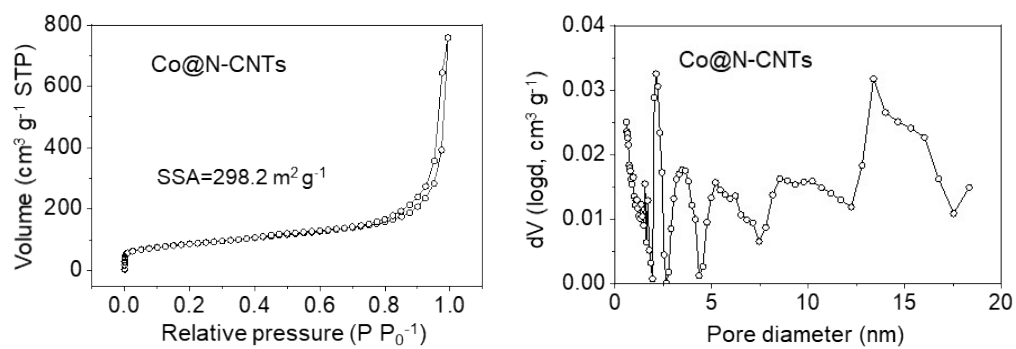

**Fig. S2** N<sub>2</sub> adsorption-desorption isotherm and pore size distribution of Co@N-CNTs.

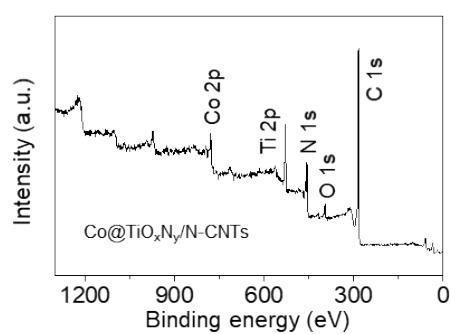

**Fig. S3** XPS spectra of survey about the Co@TiO<sub>x</sub>N<sub>y</sub>/N-CNTs composite.

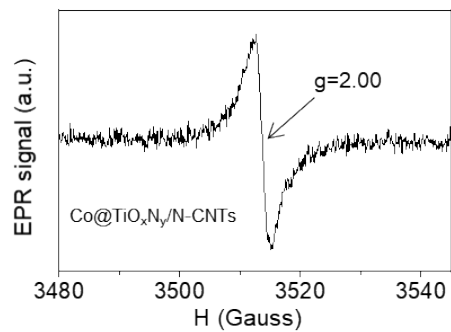

**Fig. S4** EPR spectra.

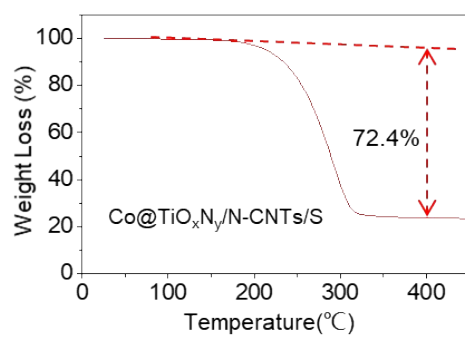

**Fig. S5** TGA curves of pure materials of Co@TiO<sub>x</sub>N<sub>y</sub>/N-CNTs/S.

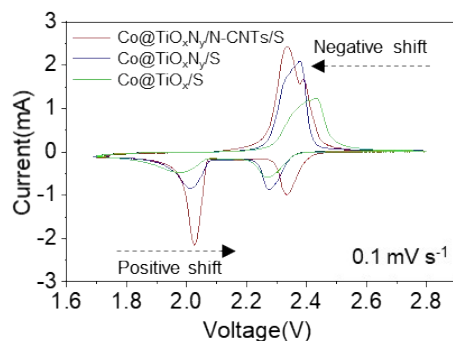

**Fig. S6** Comparison CV curves of Co@TiO<sub>x</sub>/S, Co@TiO<sub>x</sub>N<sub>y</sub>/S and Co@TiO<sub>x</sub>N<sub>y</sub>/N-CNTs/S electrodes during the first scan.

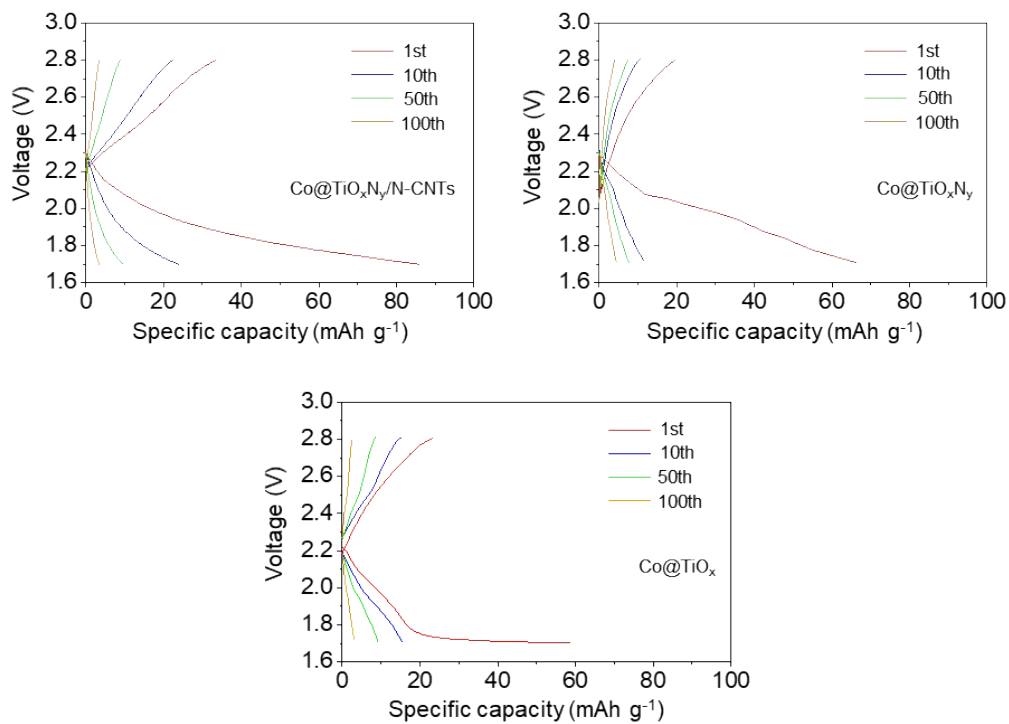

**Fig. S7** The GCD profiles of three different cathodes without sulfur loading at 0.2 C.

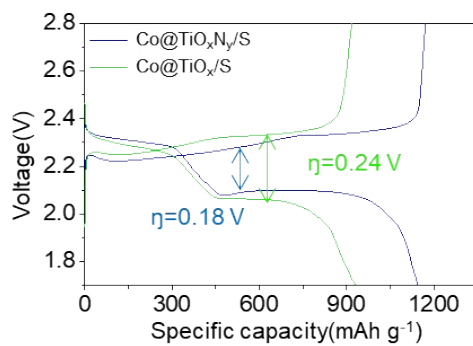

**Fig. S8** The GCD profiles at 0.2 C.

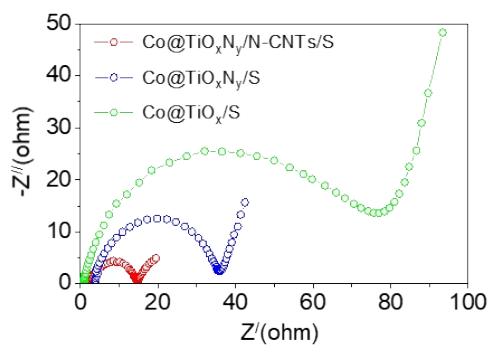

**Fig. S9** EIS of Co@TiO<sub>x</sub>N<sub>y</sub>/N-CNTs/S, Co@TiO<sub>x</sub>N<sub>y</sub>/S and Co@TiO<sub>x</sub>/S electrodes after 100 cycles at 0.2 C.

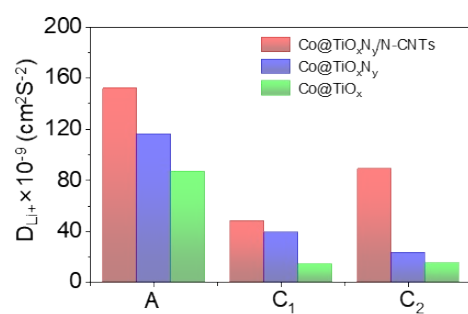

**Fig. S10** Lithium ion diffusion coefficient ( $D_{Li}$ ) values for the Co@TiO<sub>x</sub>N<sub>y</sub>/N-CNTs/S, Co@TiO<sub>x</sub>N<sub>y</sub>/S and Co@TiO<sub>x</sub>/S electrodes.

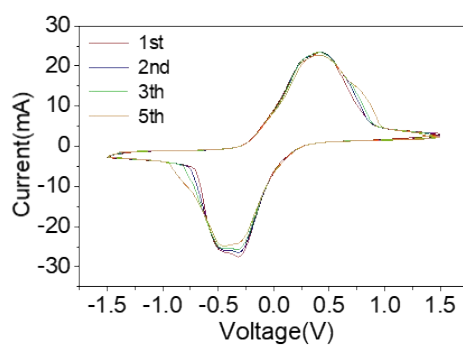

**Fig. S11** Multicycle voltammograms of the Co@TiO<sub>x</sub>N<sub>y</sub>/N-CNTs symmetric cell at 5 mV s<sup>-1</sup>.

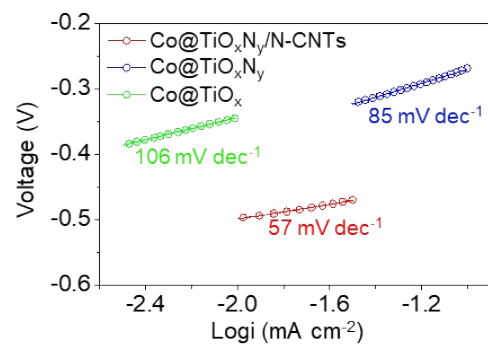

**Fig. S12** Tafel slope of Co@TiO<sub>x</sub>N<sub>y</sub>/N-CNTs, Co@TiO<sub>x</sub>N<sub>y</sub>, and Co@TiO<sub>x</sub>
